# Supplementary material for: A Novel Regional-Scale Assessment of Soil Metal Pollution in Arid Agroecosystems
Source: MDPI journal article supplement (doi:10.3390/agronomy13010161), 2023-01-04
Supplement: s1 [file s1]

**Table S1.** Descriptive statistics of main physicochemical properties of the studied soils

| Horizon    | Statistics | pH   | EC,<br>dS m <sup>-1</sup> | OM,<br>g kg <sup>-1</sup> | CEC,<br>cmolc kg <sup>-1</sup> | ESP   | Particle size<br>distribution, % |       |       | Fe    | Mn    |
|------------|------------|------|---------------------------|---------------------------|--------------------------------|-------|----------------------------------|-------|-------|-------|-------|
|            |            |      |                           |                           |                                |       | Sand                             | Silt  | Clay  |       |       |
| Surface    | Min        | 7.00 | 0.40                      | 4.90                      | 1.90                           | 1.26  | 12.90                            | 0.95  | 0.95  | 1.03  | 0.61  |
|            | Max        | 8.65 | 23.63                     | 35.27                     | 50.85                          | 50.85 | 98.10                            | 44.80 | 57.76 | 3.28  | 2.41  |
|            | Mean       | 7.84 | 7.27                      | 19.77                     | 31.27                          | 14.34 | 38.64                            | 25.68 | 35.69 | 1.91  | 1.46  |
|            | SD         | 0.34 | 5.84                      | 6.91                      | 13.04                          | 11.49 | 24.29                            | 12.58 | 14.70 | 0.81  | 0.61  |
|            | CV, %      | 4.31 | 80.44                     | 34.94                     | 41.69                          | 80.13 | 62.88                            | 48.98 | 41.20 | 42.47 | 42.08 |
| Subsurface | Min        | 7.17 | 0.40                      | 0.93                      | 1.70                           | 2.07  | 11.60                            | 0.98  | 0.97  | 0.52  | 0.44  |
|            | Max        | 8.47 | 23.46                     | 28.50                     | 57.81                          | 50.68 | 98.05                            | 42.20 | 66.45 | 3.26  | 2.19  |
|            | Mean       | 7.78 | 6.84                      | 14.40                     | 31.77                          | 17.70 | 38.48                            | 24.98 | 36.52 | 1.53  | 1.11  |
|            | SD         | 0.30 | 5.98                      | 5.44                      | 13.88                          | 12.33 | 25.13                            | 12.24 | 15.91 | 1.00  | 0.62  |
|            | CV, %      | 3.91 | 87.37                     | 37.76                     | 43.70                          | 69.65 | 65.29                            | 48.99 | 43.55 | 65.17 | 56.09 |
| Deep       | Min        | 6.95 | 0.40                      | 0.70                      | 1.80                           | 1.31  | 6.72                             | 0.90  | 0.90  | 0.34  | 0.29  |
|            | Max        | 8.40 | 23.32                     | 19.80                     | 67.29                          | 50.47 | 98.20                            | 48.74 | 77.35 | 2.77  | 1.87  |
|            | Mean       | 7.72 | 7.51                      | 11.70                     | 31.65                          | 19.21 | 38.62                            | 24.96 | 36.93 | 0.96  | 0.85  |
|            | SD         | 0.32 | 6.40                      | 4.94                      | 15.61                          | 14.05 | 27.30                            | 13.36 | 18.09 | 0.75  | 0.54  |
|            | CV, %      | 4.20 | 85.32                     | 42.18                     | 49.34                          | 73.14 | 70.69                            | 53.53 | 48.98 | 77.87 | 63.20 |

EC, electrical conductivity; OM, organic matter, CEC, cation exchange capacity; ESP, exchangeable sodium percentage; SD, standard deviation; CV, coefficient of variation



**Table S2.** Soil types according to the percentage of sand, silt, and clay based on the USDA (United States Department of Agriculture) texture triangle

| Soil type       | Frequency, % in horizons |            |        |
|-----------------|--------------------------|------------|--------|
|                 | Surface                  | Subsurface | Deep   |
| Clay loam       | 24.24                    | 22.73      | 18.18  |
| Loam            | 1.52                     | 3.03       | 4.55   |
| Clay            | 48.48                    | 50.00      | 53.03  |
| Sandy clay loam | 6.06                     | 3.03       | 3.03   |
| Sand            | 13.64                    | 13.64      | 13.64  |
| Loamy sand      | 0.00                     | 1.52       | 1.52   |
| Sandy clay      | 3.03                     | 3.03       | 3.03   |
| Silty clay      | 3.03                     | 3.03       | 3.03   |
| Total           | 100.00                   | 100.00     | 100.00 |



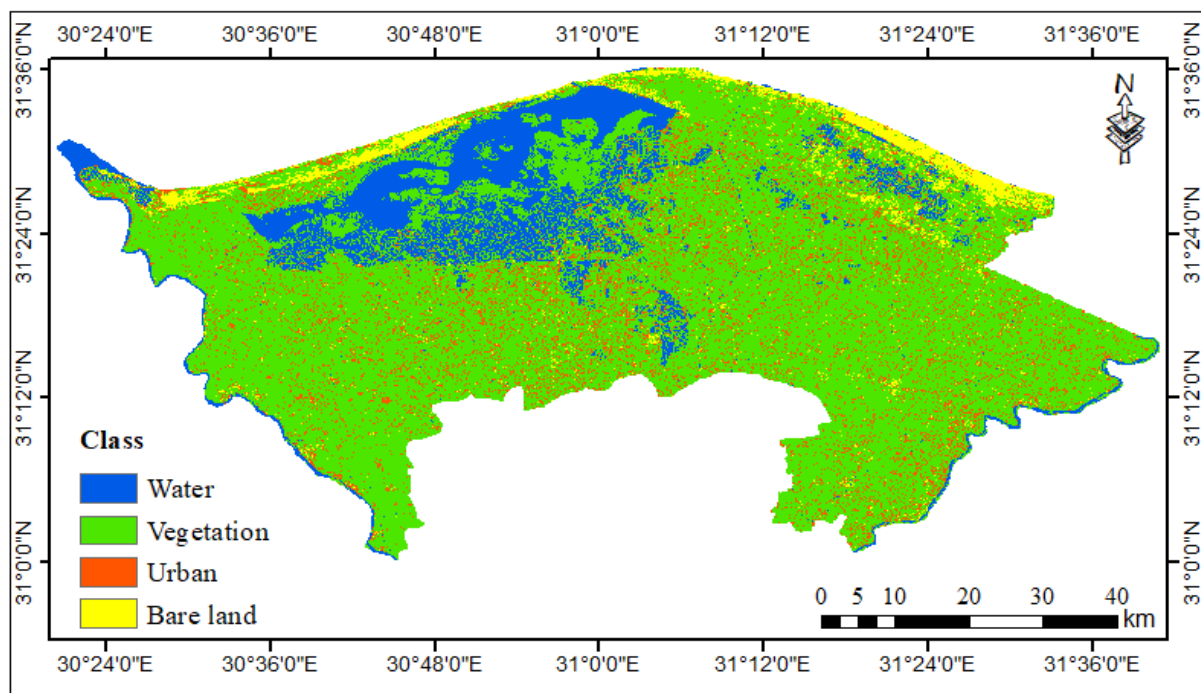

**Figure. S1.** Land use / land cover map of the studied area



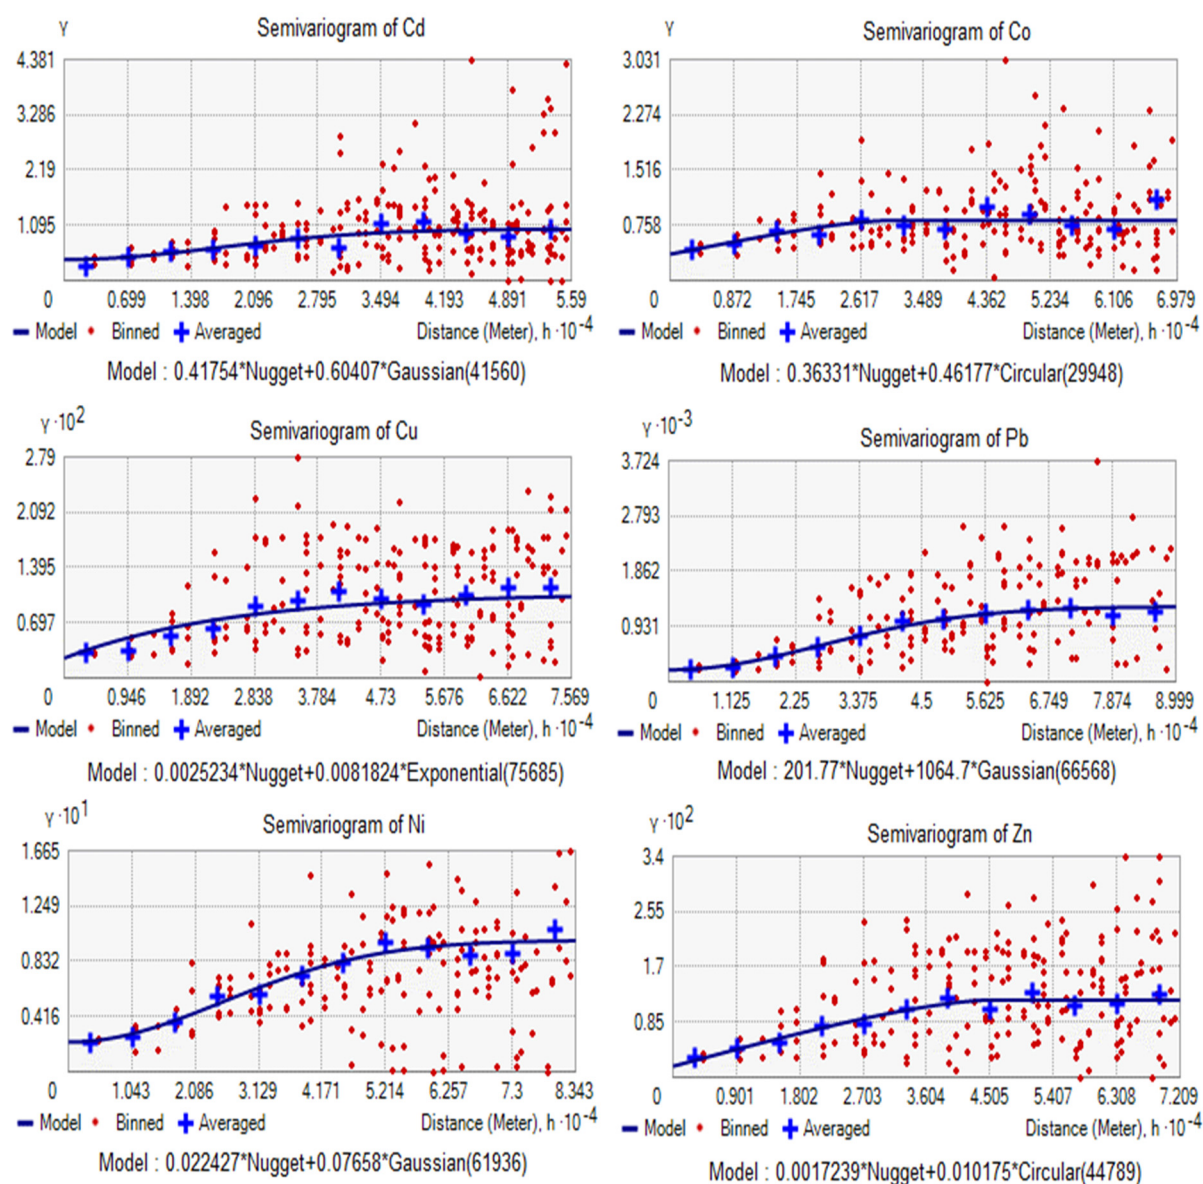

**Figure S2.** Experimental semivariograms and their best-fitted models for the studied metals



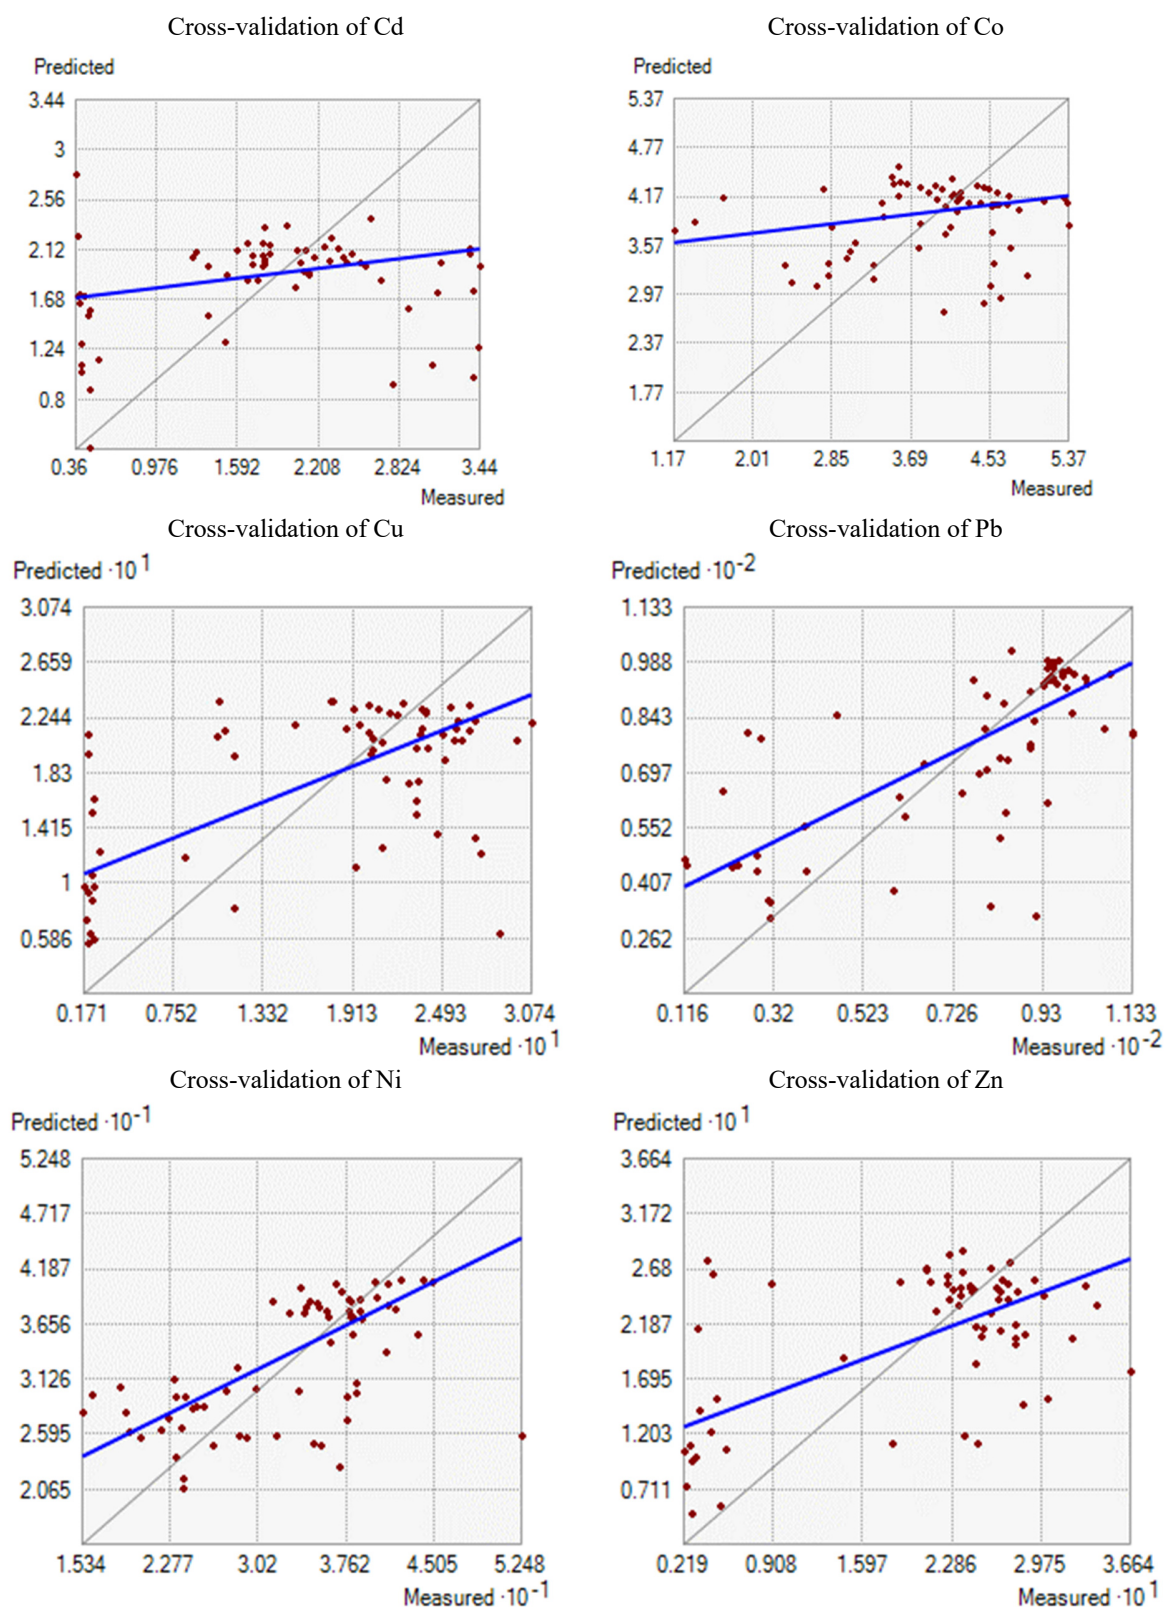

**Figure S3.** Cross-validation test of the applied ordinary kriging models



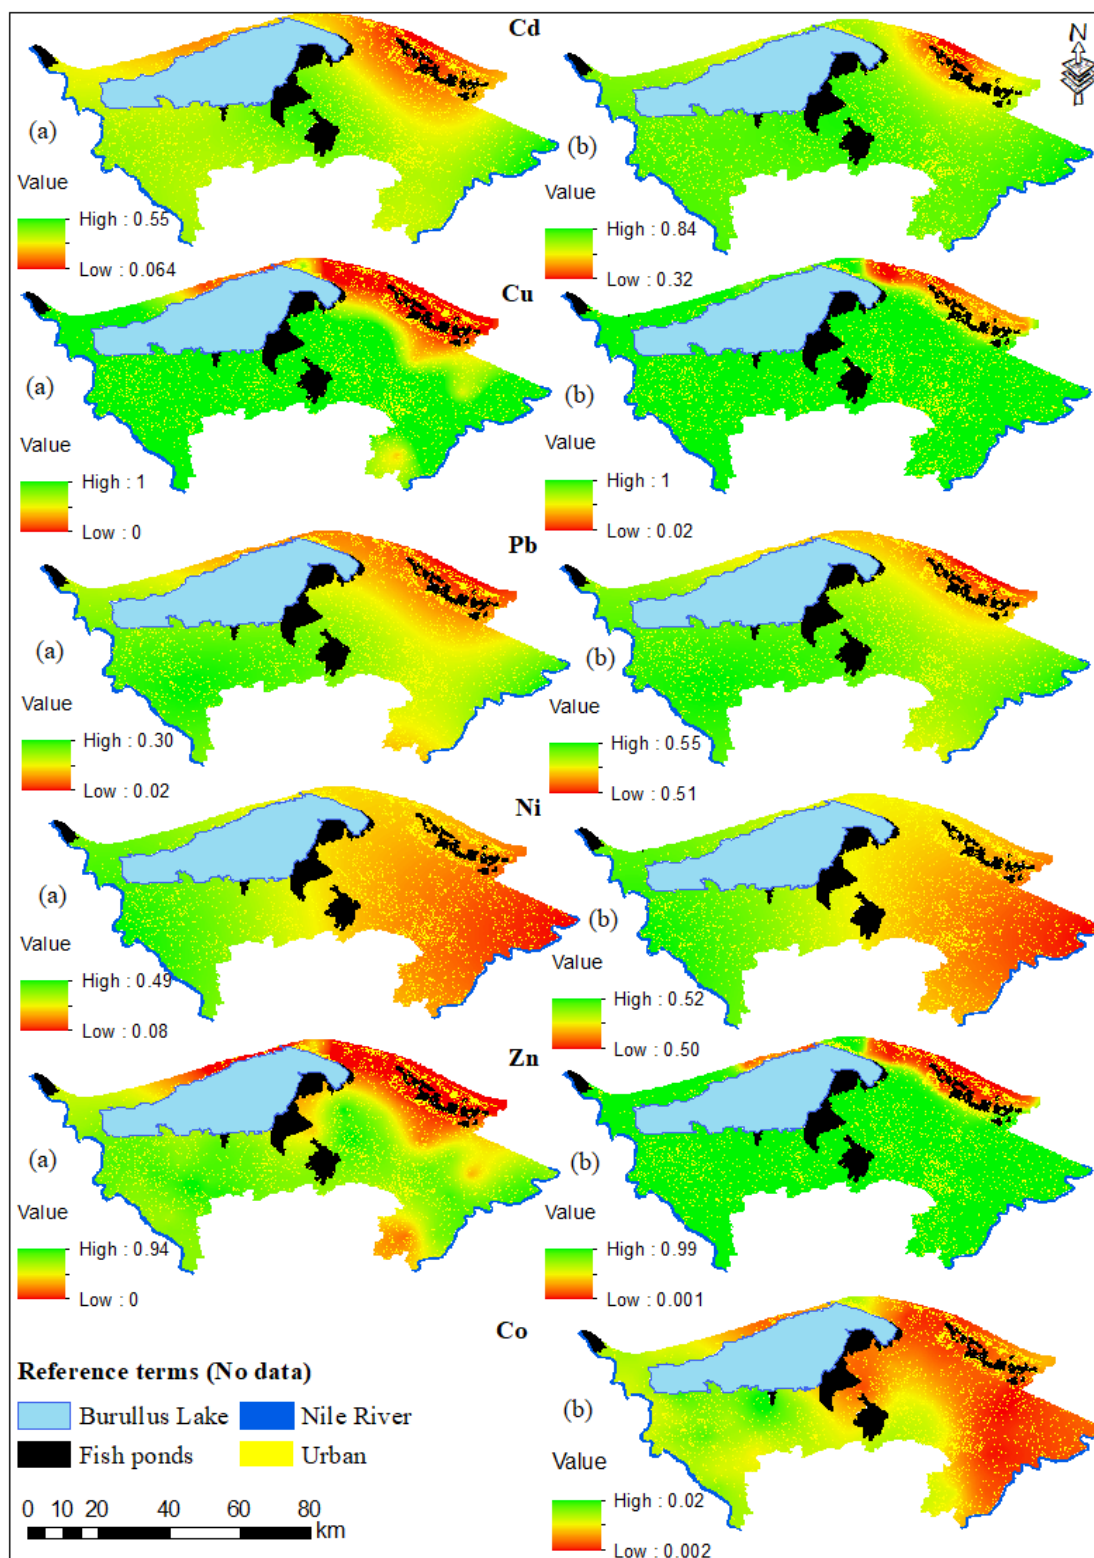

**Figure S4.** Linear (a) and non-linear (b) normalized maps of the studied metals
